# Supplementary material
Source: PubMed Central journal article supplement (PMC5686547)

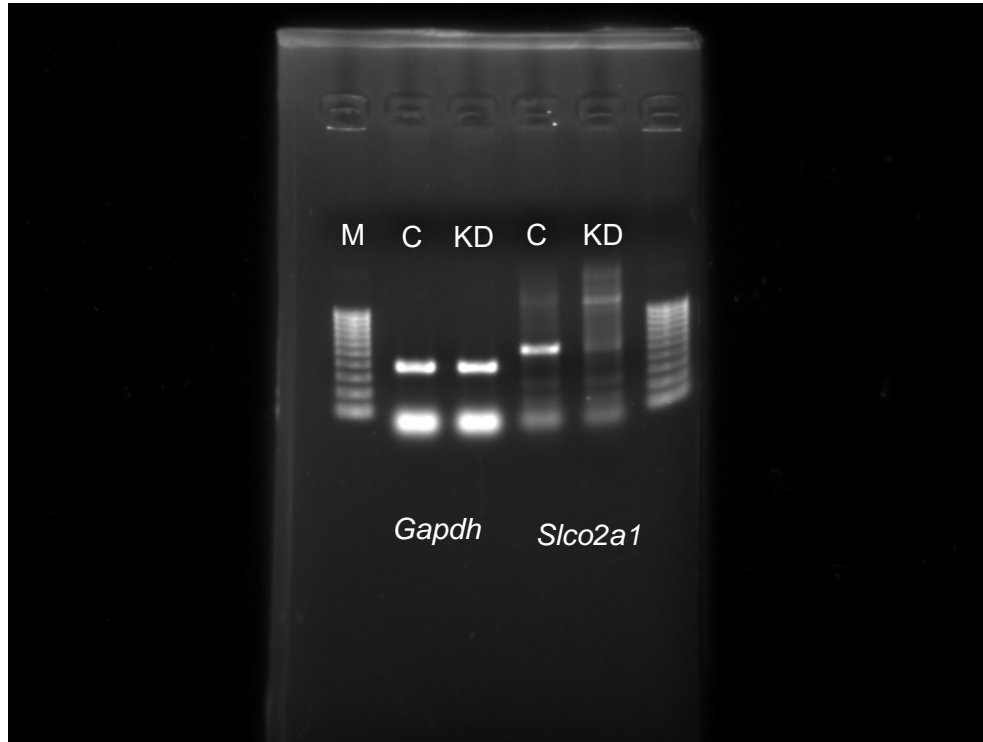

Source image of the agarose gel related to Figure 2B

Supplement: EMBJ-36-3309-s004.pdf [file EMBJ-36-3309-s004.pdf]

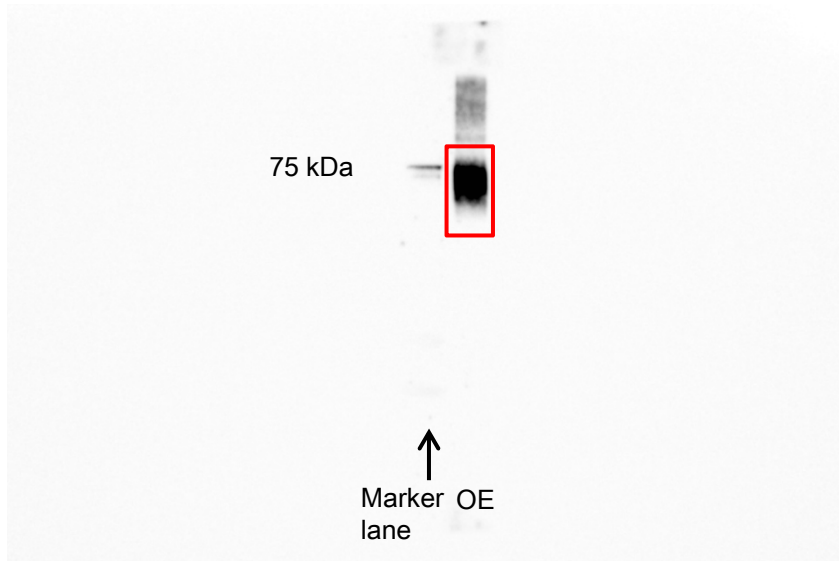

SLCO2A1 overexpression in HEK

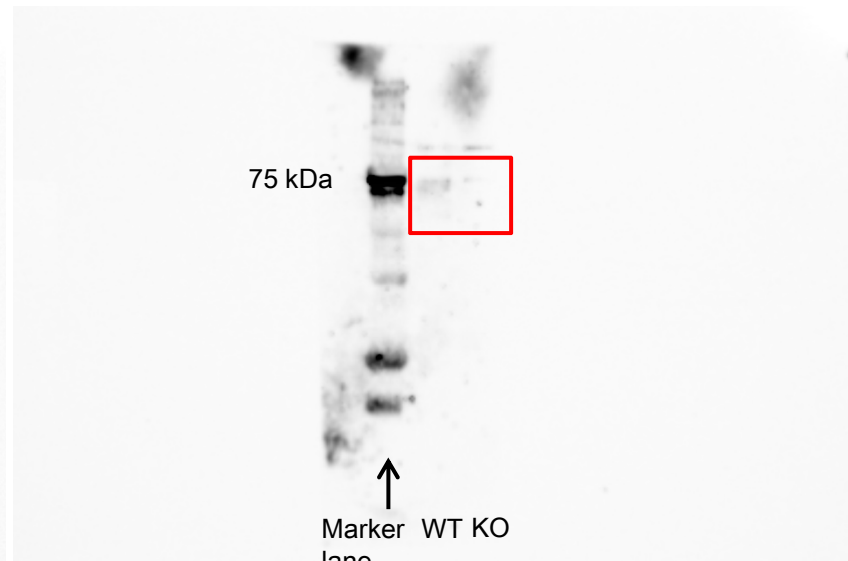

SLCO2A1

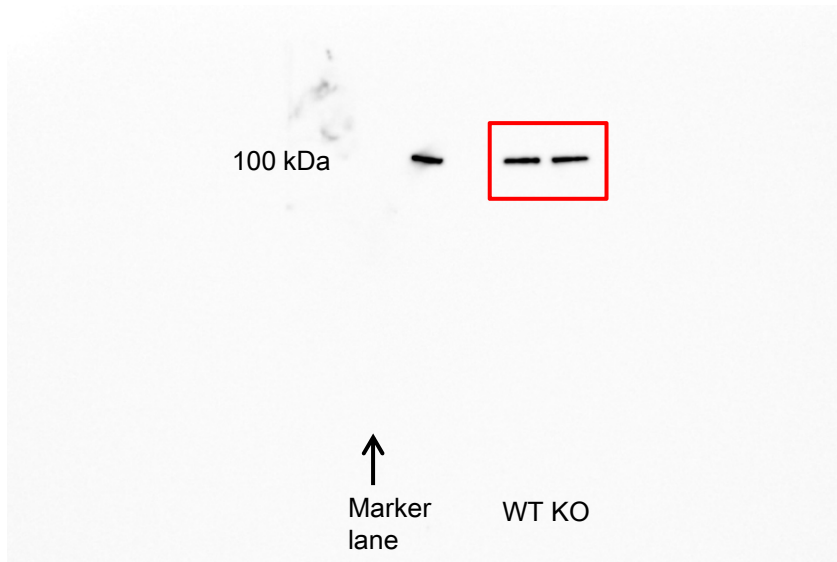

Na/K-ATPase

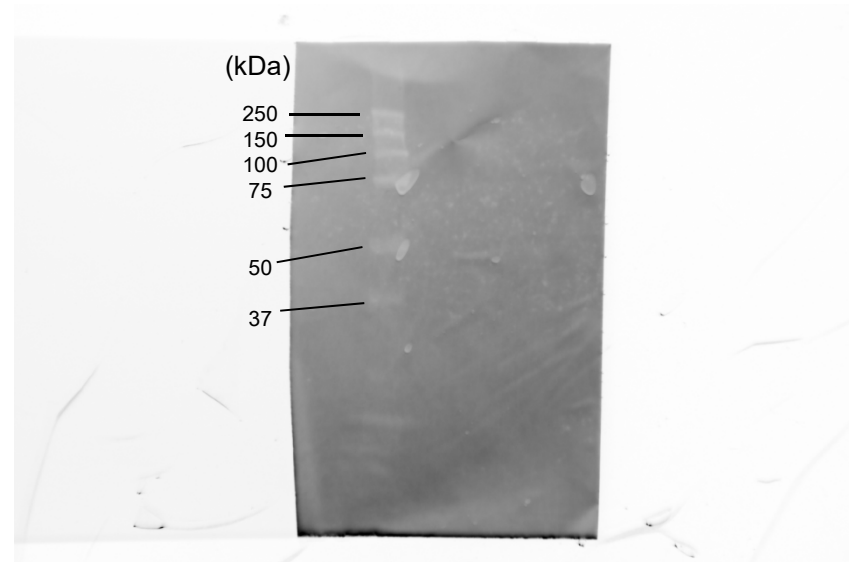

Source images related to Figure 4A

Supplement: EMBJ-36-3309-s005.pdf [file EMBJ-36-3309-s005.pdf]

**A**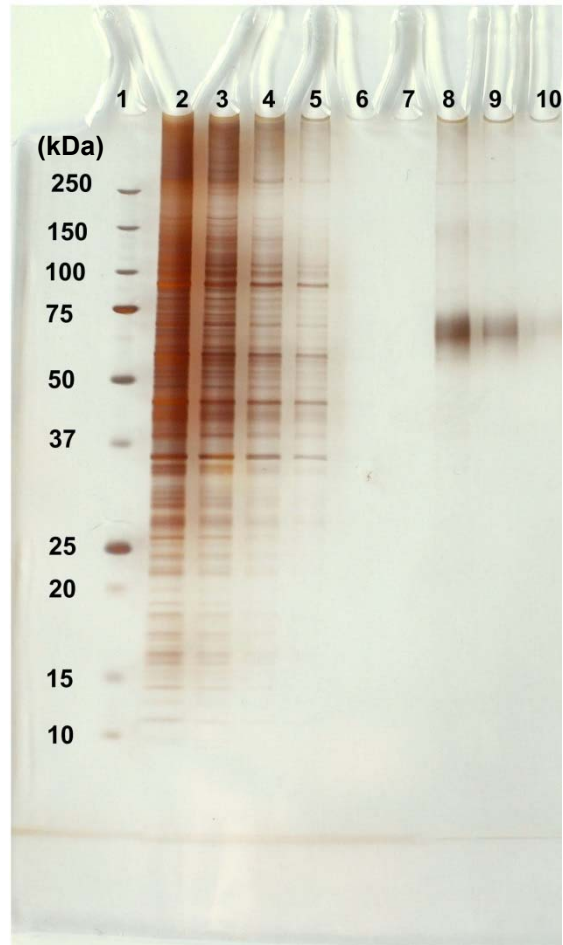

1 - markers, 2 - flow through, 3-7 - wash,  
8-10 - FLAG eluates

**B**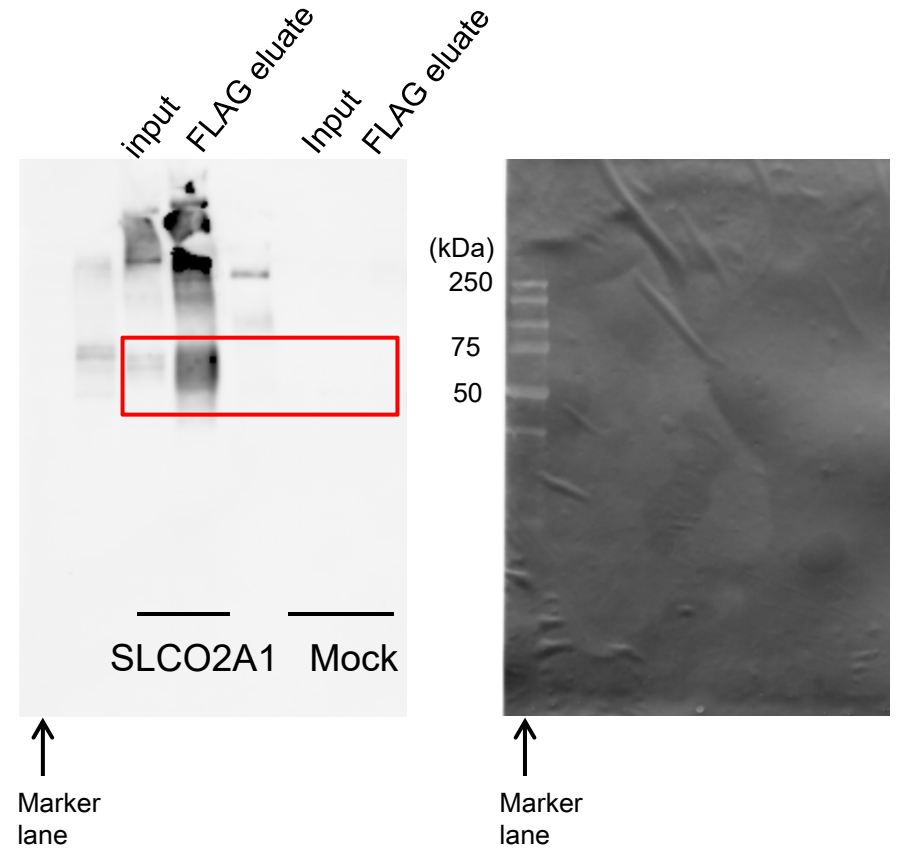

Source images related to Figure 7A and 7B

Supplement: EMBJ-36-3309-s006.pdf [file EMBJ-36-3309-s006.pdf]

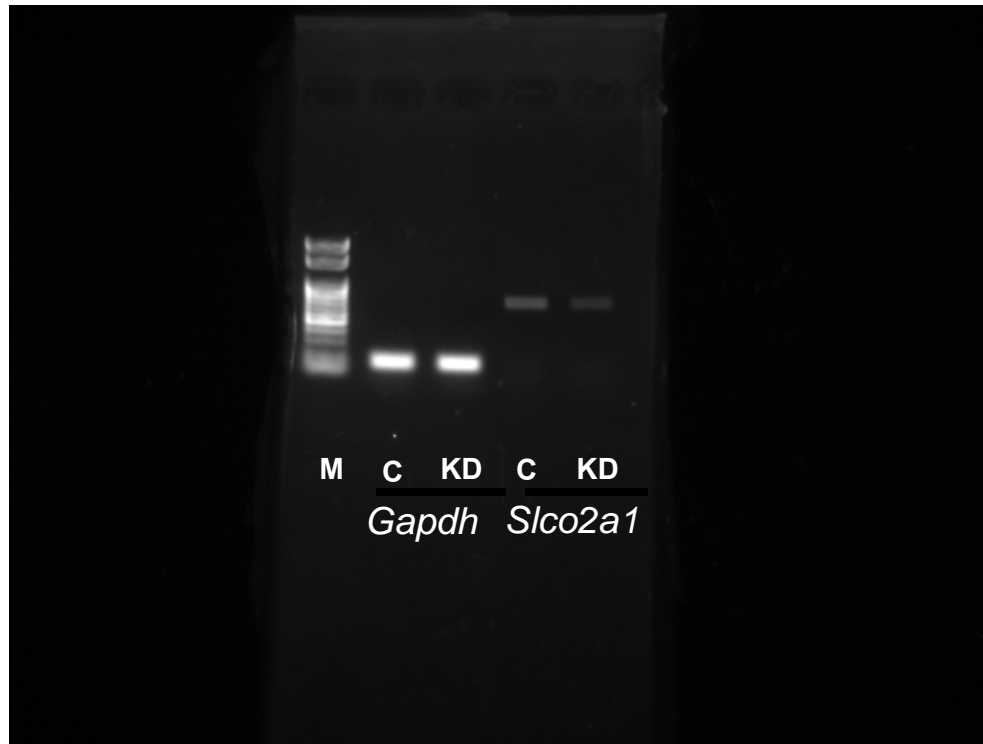

Source image of the agarose gel related to Figure 8D

Supplement: EMBJ-36-3309-s007.pdf [file EMBJ-36-3309-s007.pdf]
